# Supplementary material
Source: PubMed Central journal article supplement (PMC3811022)
Supplement: NIHMS506460-supplement-Supplemental_Figure_1.pdf [file NIHMS506460-supplement-Supplemental_Figure_1.pdf]

## Supplemental Figure 1

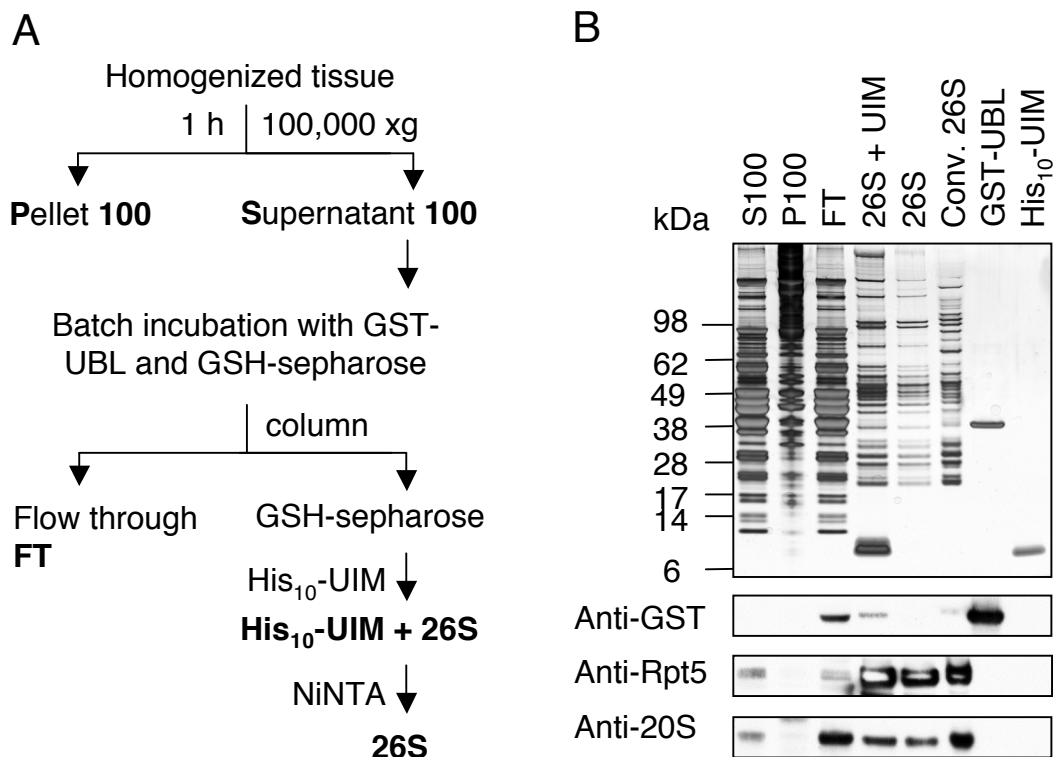

Supplemental Figure 1: Ubl-affinity purified 26S contained no trace of GST-UBL or His<sub>10</sub>-UIM. A) Frozen rabbit muscle was thawed and homogenized in a blender. Cell debris was removed by a low speed spin. The remaining homogenate was cleared from microsomes by ultracentrifugation (1 h 100,000 xg) and the respective microsomal fraction (P100) was discarded. The supernatant (S100) was supplemented with 0.1 mg GST-UBL/ml lysate as well as GSH-sepharose (250  $\mu$ l sepharose/mg GST-Ubl). After incubation (2 h) the suspension was poured into a column. The flow through (FT) was collected for analysis and the resin extensively washed with buffer. For elution the resin was gently agitated twice in 500  $\mu$ l buffer containing 2 mg/ml His<sub>10</sub>-UIM and incubated for 15 min. Subsequently the buffer containing proteasomes and excess His<sub>10</sub>-UIM was collected and incubated with 100  $\mu$ l Ni-NTA resin for 15 min. The Ni-NTA was removed by spinning the sample through a 0.22  $\mu$ m filter and pure proteasomes were retrieved. B) Samples from the purification marked bold in A) were taken and subjected to SDS gel electrophoresis and Western blot. 10  $\mu$ g of S100, P100 and FT, 1.5  $\mu$ g of isolated 26S and the corresponding volume of 26S still containing the UIM were loaded. For comparison 1.5  $\mu$ g of conventionally by multi-step chromatography purified proteasome was loaded (the respective mass spectrometric analysis of these two lanes is presented in figure 2C). 0.5  $\mu$ g GST-UBL and 3  $\mu$ g His<sub>10</sub>-UIM were loaded as controls. The Western blot was performed with antibodies against GST, Rpt5, and 20S as indicated.
